# Supplementary material
Source: PubMed Central journal article supplement (PMC8144213)
Supplement: 41416_2021_1368_MOESM1_ESM.pdf [file 41416_2021_1368_MOESM1_ESM.pdf]

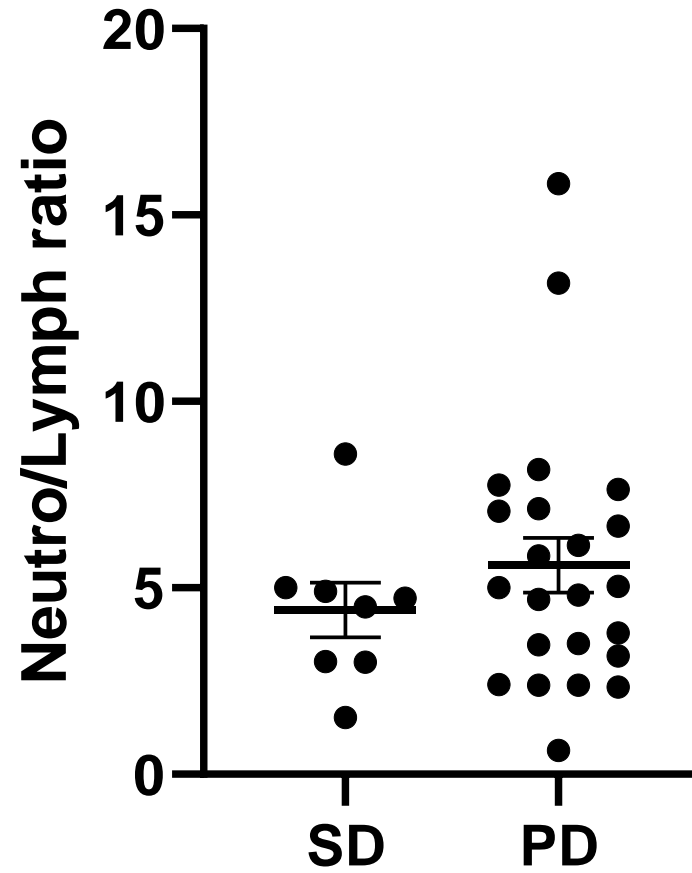

P=0.34

Baseline neutrophil to lymphocyte ratio of stable disease (SD) and progressive disease (PD)

Progression Free Survival

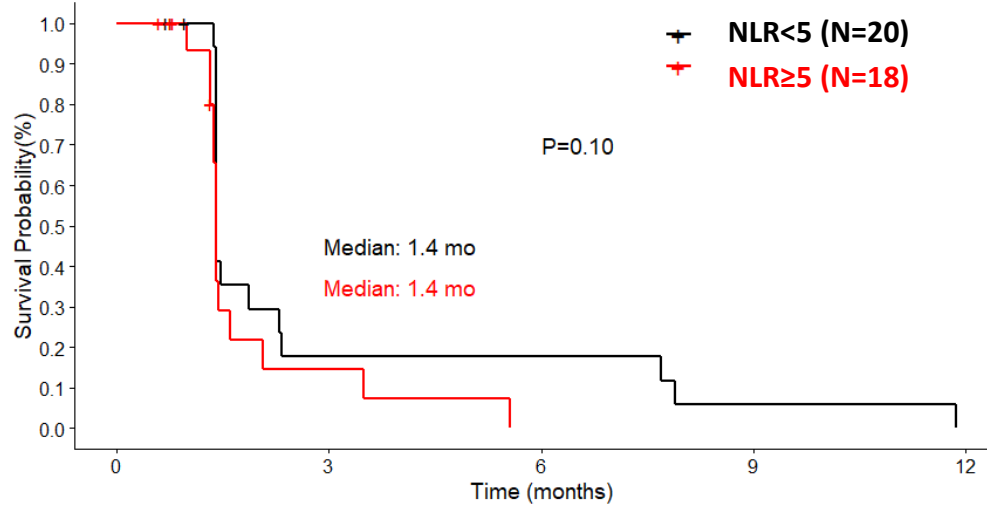

| Number at risk |    | 0  | 3 | 6 | 9 | 12 |
|----------------|----|----|---|---|---|----|
| —              | 20 | 20 | 3 | 3 | 1 | 0  |
| —              | 18 | 18 | 2 | 0 | 0 | 0  |

HR: 0.59 (95% CI: 0.28-1.24)

Overall Survival

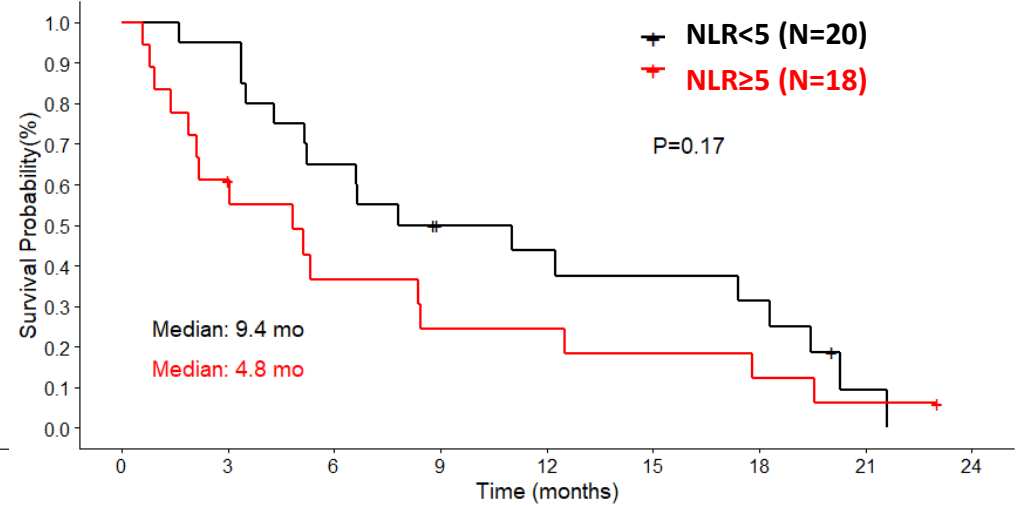

| Number at risk |    | 0  | 3  | 6  | 9 | 12 | 15 | 18 | 21 | 24 |
|----------------|----|----|----|----|---|----|----|----|----|----|
| —              | 20 | 20 | 19 | 13 | 8 | 7  | 6  | 5  | 1  | 0  |
| —              | 18 | 18 | 11 | 6  | 4 | 4  | 3  | 2  | 1  | 0  |

HR: 0.62 (95% CI: 0.31-1.24)

Kaplan-Meier Survival Curves of progression free survival and overall survival by baseline neutrophil to lymphocyte ratio between < 5 vs ≥ 5. (CI: confidence interval, HR: hazard ratio, NLR: neutrophil to lymphocyte ratio)
